# Supplementary material
Source: PubMed Central journal article supplement (PMC5508591)
Supplement: NIHMS874070-supplement-1.pdf [file NIHMS874070-supplement-1.pdf]

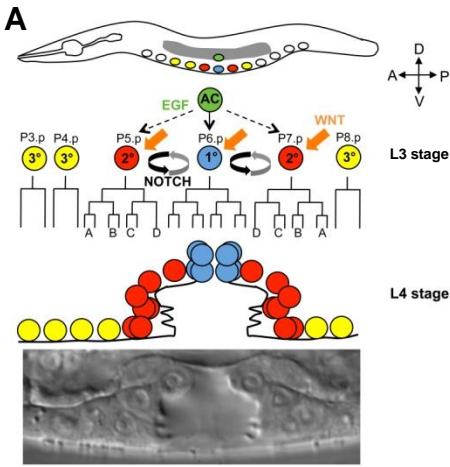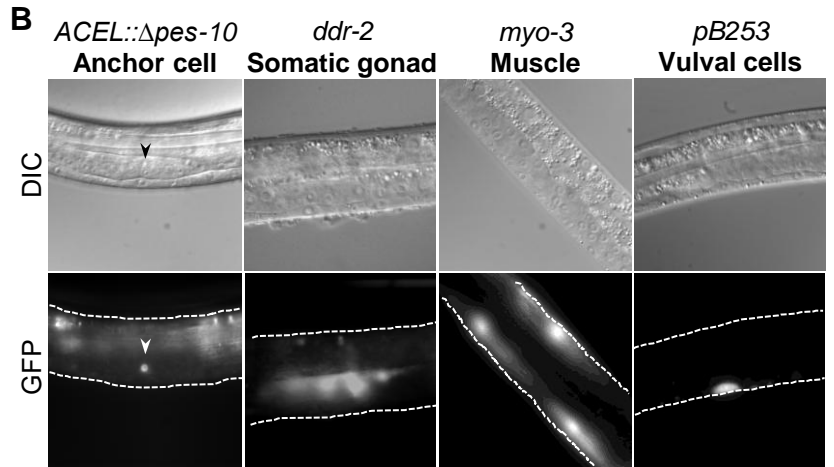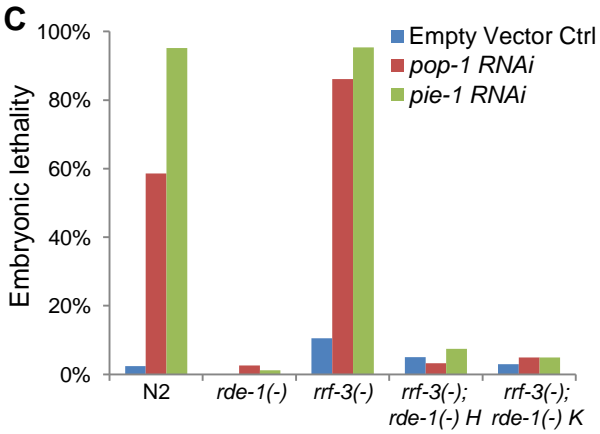

**D**

| RNAi          | <i>rde-1(+)</i>         | <i>rde-1(-)</i> | <i>Mesoderm-rde</i>     |
|---------------|-------------------------|-----------------|-------------------------|
| <i>lin-3</i>  | 13/17 Vul               | 20/20 Normal    | 10/28 Vul               |
|               | 4/17 Partial Induction  |                 |                         |
| <i>lin-39</i> | 1/56 Normal             |                 | 51/62 Normal            |
|               | 13/56 Partial induction | 58/58 Normal    | 10/62 Partial induction |
|               | 42/56 Vul               |                 | 1/62 Vul                |

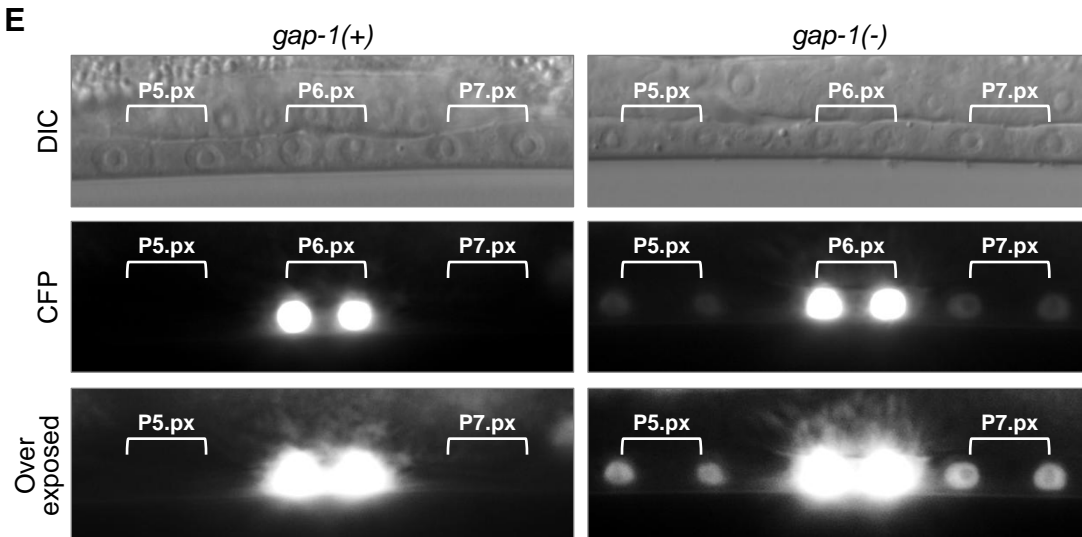

**F**

| WormMart                        | # Genes | % Conserved | <i>p</i> -value |
|---------------------------------|---------|-------------|-----------------|
| Total genes in RNAi library     | 16,256  |             |                 |
| Conserved genes in RNAi library | 7,670   | 47.2        |                 |
| Identified mesodermal genes     | 39      |             |                 |
| Conserved mesodermal genes      | 31      | 79.5        | 0.00007         |

**Figure S1 related to Figure 1 and Figure 3. Mesodermal RNAi in *C. elegans* identifies conserved factors.** **(A)** Schematic of vulva development. Top: circles depict VPCs and anchor cell (AC). Gonad is in gray. Middle: during larval L3 stage, signaling pathways frequently mutated in human cancer induce VPCs to divide to form the 22 cells of the mature vulva, a DIC image of which is shown at the mid-larval L4 stage (bottom). A, anterior; P, posterior; V, ventral; D, dorsal. Reproduced / adapted with permission from Green et al., *Development*, 2007. **(B)** DIC (top) and fluorescence (bottom) images of larval L3 transgenic worms expressing GFP driven by tissue-specific promoters active in the anchor cell (arrowhead), somatic gonad, muscle, and vulval cells. Dashed lines indicate worm body boundaries. **(C)** RNAi sensitivity was enhanced by introducing the *rrf-3* mutation (*rrf-3(-)*). Introduction of the *rrf-3(-)* allele did not inadvertently alter RNAi resistance of *rde-1(-)* strains because *rrf-3(-); rde-1(-)* double mutants were viable upon RNAi-mediated depletion of two essential genes, *pop-1* (TCF/LEF transcription factor) and *pie-1* (CCCH zinc finger protein). Embryonic lethality was evaluated in two independent *rrf-3(-); rde-1(-)* double mutant isolates, *H* and *K*. N2, wild-type. **(D)** Summary of Vulvaless phenotypes (Vul) after RNAi-mediated depletion of *lin-3* and *lin-39* in wild-type *rde-1* worms (*rde-1(+)*), *rde-1* mutants (*rde-1(-)*) and *rde-1(-)* mutants with mesoderm-specific RNAi (*mesoderm-rde*). **(E)** DIC and fluorescence images of wild-type *gap-1* (*gap-1(+)*) and *gap-1*-mutant (*gap-1(-)*) worms expressing a LET-60/RAS-dependent transcriptional reporter. Cell lineages are designated as P6.px (presumptive 1° cell fate) and P5.px and P7.px (presumptive 2° cell fate). Bottom panels are overexposed to better visualize CFP expression in P5.px and P7.px cells. **(F)** Percentage of genes with mammalian orthologs for all *C. elegans* genes included in the RNAi library or the 39 mesodermal genes identified by the RNAi screen. P=0.00007, Fisher's exact test.

A

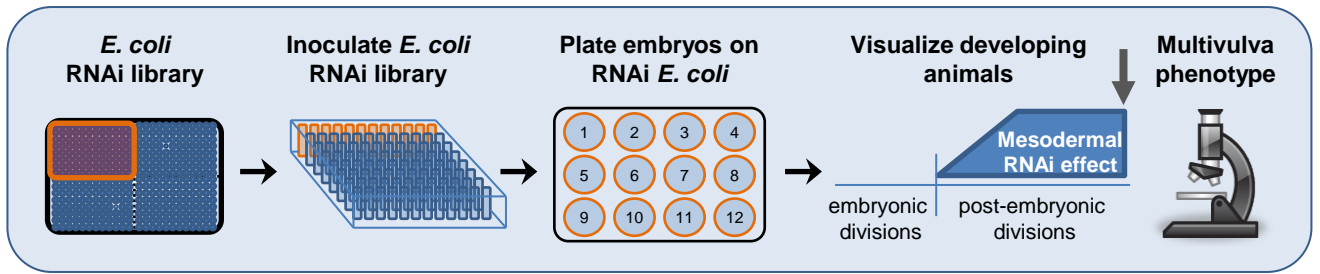

B

| Chr. #                             | RNAi Library ID | C. elegans Gene  | Human Ortholog     | Gene Description                                            |
|------------------------------------|-----------------|------------------|--------------------|-------------------------------------------------------------|
| <b>Chromatin Remodeling</b>        |                 |                  |                    |                                                             |
| I                                  | K07A1.11        | <i>rba-1</i>     | <i>RBBP4</i>       | retinoblastoma binding protein 4                            |
| II                                 | ZK131.9         | <i>his-15</i>    | <i>HIST2H2BF</i>   | histone cluster 2, H2bf                                     |
| III                                | Y49E10.6        | <i>his-72</i>    | <i>H3F3A/H3F3B</i> | histone H3.3                                                |
| III                                | C07A9.3         | <i>tlk-1</i>     | <i>TLK1/TLK2</i>   | tousled-like kinase 1/2                                     |
| IV                                 | F55G1.10        | <i>his-61</i>    | <i>HIST2H2AB</i>   | histone cluster 2, H2ab                                     |
| IV                                 | T22D1.10        | <i>ruvb-2</i>    | <i>RUVBL2</i>      | RuvB-like AAA ATPase 2                                      |
| V                                  | F45F2.3         | <i>his-5</i>     | <i>HIST1H4H</i>    | histone cluster 1, H4h                                      |
| V                                  | C55A6.9         | <i>C55A6.9</i>   | <i>PAF1</i>        | RNA polymerase II associated factor                         |
| <b>Cytoplasmic Polyadenylation</b> |                 |                  |                    |                                                             |
| I                                  | B0414.5         | <i>cpb-3</i>     | <i>CPEB1</i>       | cytop. polyadenylation element binding protein 1            |
| V                                  | F25G6.2         | <i>symk-1</i>    | <i>SYMPK</i>       | symplekin                                                   |
| <b>Translational Regulation</b>    |                 |                  |                    |                                                             |
| I                                  | F26A3.2         | <i>ncbp-2</i>    | <i>NCBP2</i>       | nuclear cap binding protein subunit 2, 20kDa                |
| II                                 | Y57A10A.30      | <i>ife-5</i>     | <i>EIF4E</i>       | eukaryotic translation initiation factor 4E                 |
| IV                                 | F55F10.1        | <i>F55F10.1</i>  | <i>MDN1</i>        | MDN1, midasin homolog (yeast)                               |
| IV                                 | Y51H4A.15       | <i>Y51H4A.15</i> | <i>TSR2</i>        | 20S rRNA accumulation, homolog ( <i>S. cerevisiae</i> )     |
| V                                  | D1054.15        | <i>plrg-1</i>    | <i>PLRG1</i>       | pleiotropic regulator 1 (PRL1 homolog, <i>Arabidopsis</i> ) |
| <b>Other Functions</b>             |                 |                  |                    |                                                             |
| I                                  | W02D9.1         | <i>pri-2</i>     | <i>PRIM2</i>       | primase, DNA, polypeptide 2 (58kDa)                         |
| II                                 | K10G6.1         | <i>lin-31</i>    | <i>FOXB1</i>       | Forkhead Box B1                                             |
| II                                 | R53.3           | <i>egl-43</i>    | <i>PRDM16</i>      | PR domain containing 16                                     |
| II                                 | ZK430.1         | <i>toe-1</i>     | <i>HEATR1</i>      | HEAT repeat containing 1                                    |
| II                                 | C56E6.1         | <i>abcx-1</i>    | <i>ABCG5</i>       | ATP-binding cass., sub-family G (WHITE), mem. 5             |
| III                                | F58A4.4         | <i>pri-1</i>     | <i>PRIM1</i>       | primase, DNA, polypeptide 1 (49kDa)                         |
| III                                | T26G10.1        | <i>T26G10.1</i>  | <i>DDX47</i>       | DEAD (Asp-Glu-Ala-Asp) box polypeptide 47                   |
| IV                                 | C37F5.1         | <i>lin-1</i>     | <i>ELK3</i>        | ETS-Domain Protein (SRF Accessory Protein 2)                |
| IV                                 | H34C03.2        | <i>H34C03.2</i>  | <i>USP4</i>        | ubiquitin specific peptidase 4                              |
| V                                  | F22F7.2         | <i>F22F7.2</i>   | <i>SCCPDH</i>      | saccharopine dehydrogenase (putative)                       |
| V                                  | W02H5.4         | <i>W02H5.4</i>   | <i>POGK</i>        | pogo transposable element with KRAB domain                  |
| V                                  | H14N18.1        | <i>unc-23</i>    | <i>BAG2</i>        | BCL2-associated althano gene 2                              |
| V                                  | ZK856.10        | <i>ZK856.10</i>  | <i>POLR3H</i>      | pol (RNA) III (DNA directed) polypep. H (22.9kD)            |
| X                                  | F13D11.2        | <i>hbl-1</i>     | <i>ZNF124</i>      | zinc finger protein 124                                     |
| X                                  | K09E2.1         | <i>K09E2.1</i>   | <i>COL6A6</i>      | collagen, type VI, alpha 6                                  |
| X                                  | T27B1.2         | <i>ztf-19</i>    | <i>PRDM10</i>      | PR domain containing 10                                     |
| <b>Nematode-Specific</b>           |                 |                  |                    |                                                             |
| IV                                 | F38A5.6         | <i>F38A5.6</i>   | N/A                | Unknown                                                     |
| IV                                 | F38E11.9        | <i>F38E11.9</i>  | N/A                | Unknown                                                     |
| IV                                 | C43F9.4         | <i>C43F9.4</i>   | N/A                | Unknown                                                     |
| IV                                 | W02A2.8         | <i>W02A2.8</i>   | N/A                | Unknown                                                     |
| V                                  | Y45G12C.14      | <i>srj-19</i>    | N/A                | serpentine receptor, class J                                |
| V                                  | ZK697.4         | <i>sri-27</i>    | N/A                | serpentine receptor, class I                                |
| V                                  | ZC317.6         | <i>ZC317.6</i>   | N/A                | Unknown                                                     |
| X                                  | C24H10.1        | <i>C24H10.1</i>  | N/A                | claudin homolog                                             |

**Figure S2 related to Figure 2. Genome-wide RNAi screen identifies conserved mesodermal factors that suppress ectopic epithelial cell division. (A)** Experimental workflow of the genome-wide mesoderm-specific RNAi screen. **(B)** The 39 genes identified by mesoderm-specific RNAi screen are grouped based on annotated functions. Chr., chromosome.

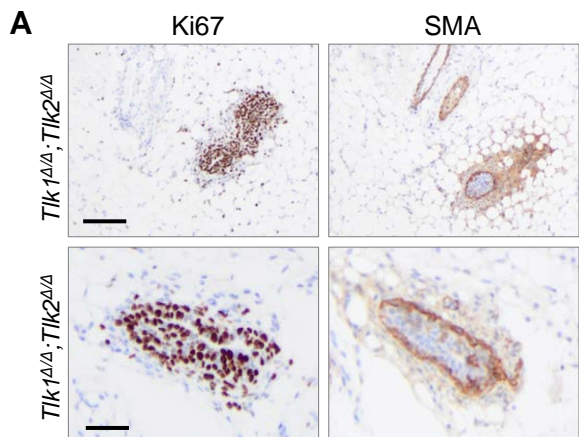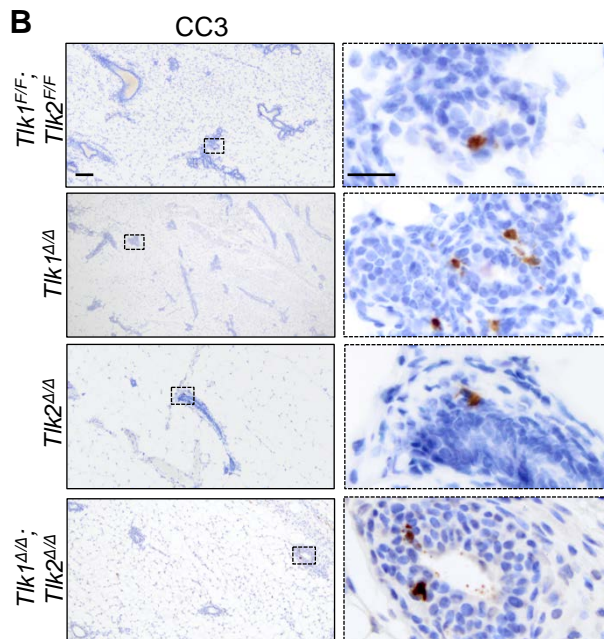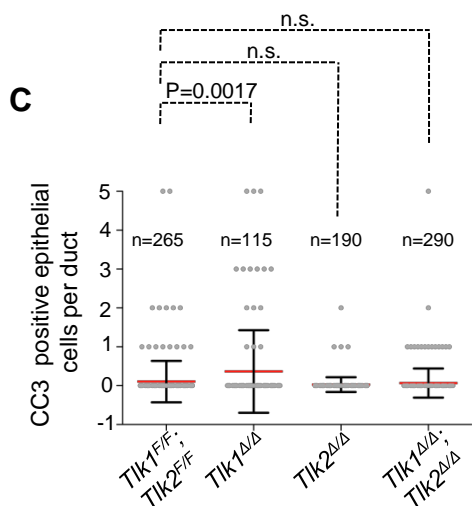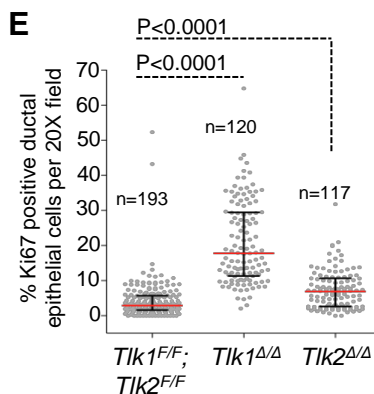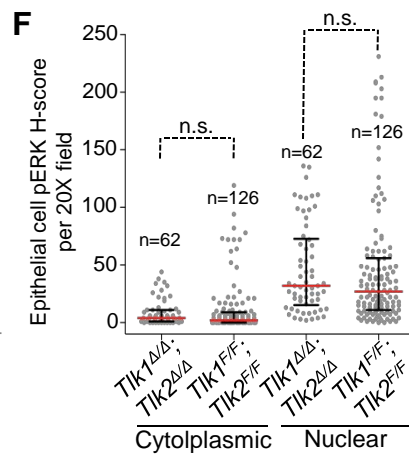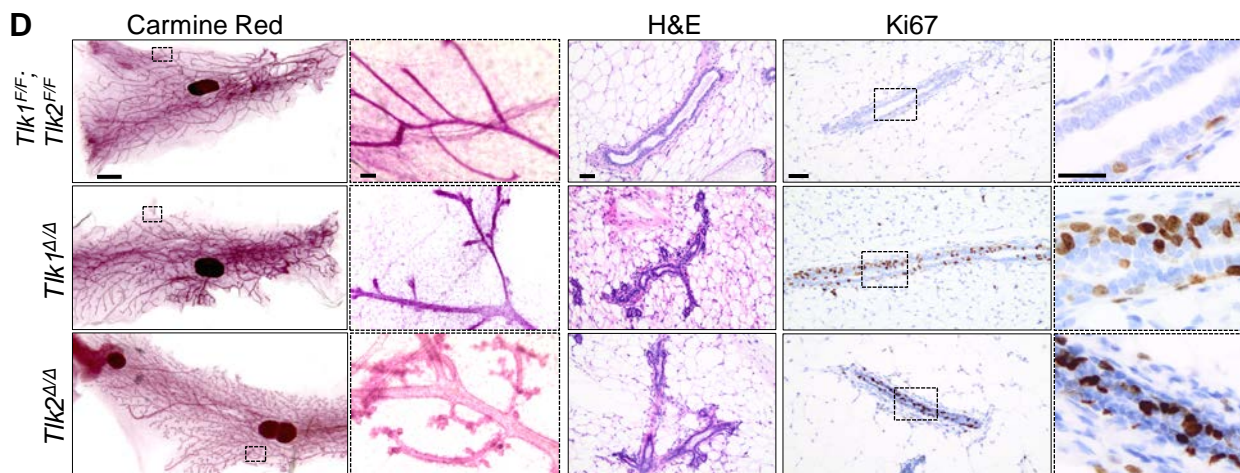

**Figure S3 related to Figure 4. *In vivo* deletion of *Tik1/2* in mouse mammary fibroblasts**

**increases the proliferation of adjacent epithelial cells. (A)** Examples of sections from *Fsp-cre; Tik1<sup>F/F</sup>; Tik2<sup>F/F</sup>* (*Tik1<sup>Δ/Δ</sup>; Tik2<sup>Δ/Δ</sup>*) mice immune-stained with Ki67 or smooth muscle actin (SMA) and counterstained with hematoxylin (blue) (top, bar = 100 μm; bottom, bar = 50 μm). **(B)** Representative images of sections of inguinal mammary gland from *Tik1<sup>F/F</sup>; Tik2<sup>F/F</sup>* mice (control), *Tik1<sup>Δ/Δ</sup>*, *Tik2<sup>Δ/Δ</sup>* or *Tik1<sup>Δ/Δ</sup>; Tik2<sup>Δ/Δ</sup>* mice immuno-stained for cleaved caspase-3 (CC3; brown) and counterstained with hematoxylin (blue) (bar = 50 μm). Boxes indicate area of magnification in adjacent panel (bar = 20 μm). **(C)** Number of CC3 positive cells per duct (dots) of tissue described in (B). Red bar, mean; black bars, S.D.; pooled counts from 2 mice of each genotype; n.s., not significant. P value: Student's t-test. **(D)** Left: Bright field images of whole mount inguinal mammary glands from 10-week-old *Tik1<sup>F/F</sup>; Tik2<sup>F/F</sup>* (control), *Fsp-cre; Tik1<sup>F/F</sup>* (*Tik1<sup>Δ/Δ</sup>*) and *Tik2<sup>Δ/Δ</sup>* mice stained with carmine red (bar = 2000 μm). Boxes indicate area of magnification in adjacent panel (bar = 100 μm). Middle: H&E stained sections of opposite inguinal gland (bar = 50 μm). Right: representative images of sections of inguinal mammary glands immuno-stained for Ki67 (brown) and counterstained with hematoxylin (blue) (bar = 50 μm). Boxes indicate area of magnification in adjacent panel (bar = 20 μm). **(E)** Percent Ki67 positive epithelial cells per 20X field (dots) of tissue sections described in (A). Red bar, median; black bars, interquartile range; pooled counts from 6 control mice or 3 and 5 mice for the *Tik1<sup>Δ/Δ</sup>* and *Tik2<sup>Δ/Δ</sup>* groups respectively. P value: Mann-Whitney test of medians. **(F)** Quantification of phospho-ERK (pERK) positive epithelium from both cytoplasmic and nuclear signal per 20X field (dots). Red bar, median; black bars, interquartile range; pooled counts from 3 control or 5 *Tik1<sup>Δ/Δ</sup>; Tik2<sup>Δ/Δ</sup>* mice. P value: Mann-Whitney test of medians.



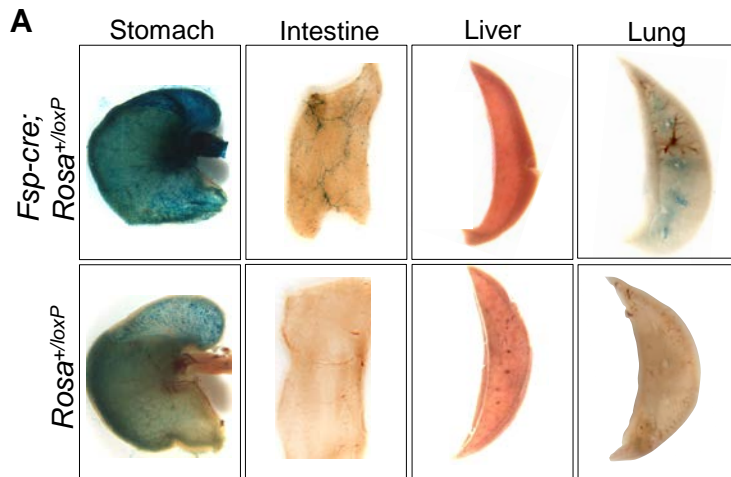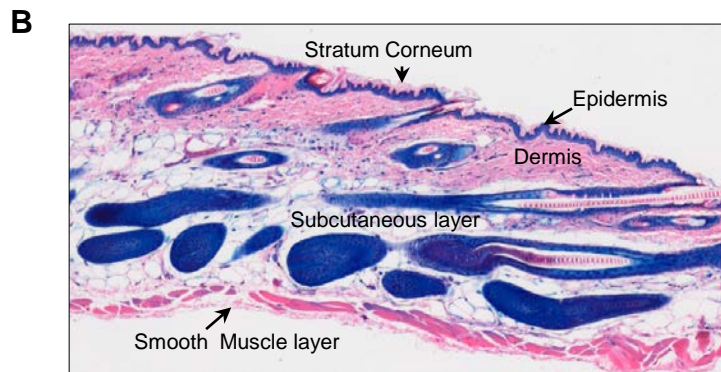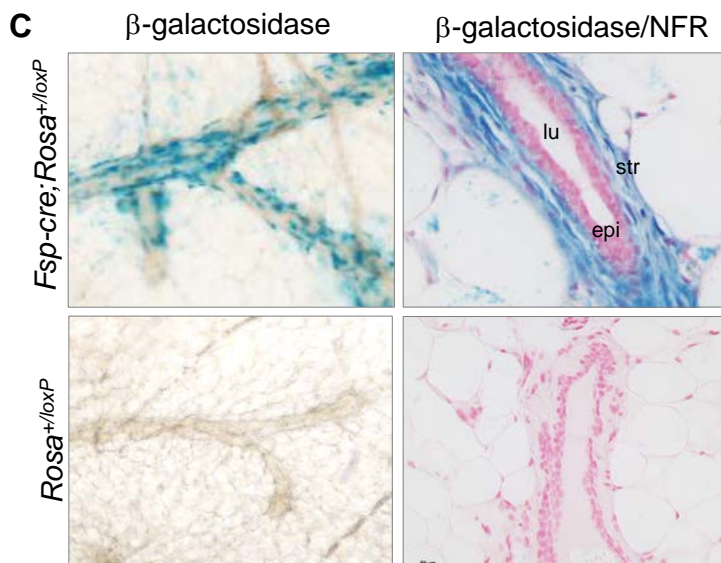

**Figure S4 related to Figure 4 and Figure 5. *Fsp-cre* transgene expression in various tissues.** **(A)** Organs and glands were isolated from the *fsp-cre* line possessing only the RosaloxP reporter, fixed and stained for conditional  $\beta$ -galactosidase reporter activity in situ. Staining of the stomach is from intestinal bacteria as evidenced by the control while minimal staining was observed in the liver, lung, and intestine with most if not all staining from connective tissue and associated with the vasculature. **(B)** In situ X-gal staining of skin from a *Fsp-cre;Rosa<sup>+loxP</sup>* mouse, that was then paraffin embedded and sectioned. *-cre* expression was detected in every cell type in the skin: Adipocytes, Smooth Muscle, Epithelium and Stroma. **(C)** Higher (10x) magnification of wholemount mammary glands from Figure 4J from mice with the indicated genotypes; cross sections stained for  $\beta$ -galactosidase and counterstained with nuclear fast red (NFR, bottom panels). Str, stromal fibroblasts; lu, lumen; epi, epithelial cells.



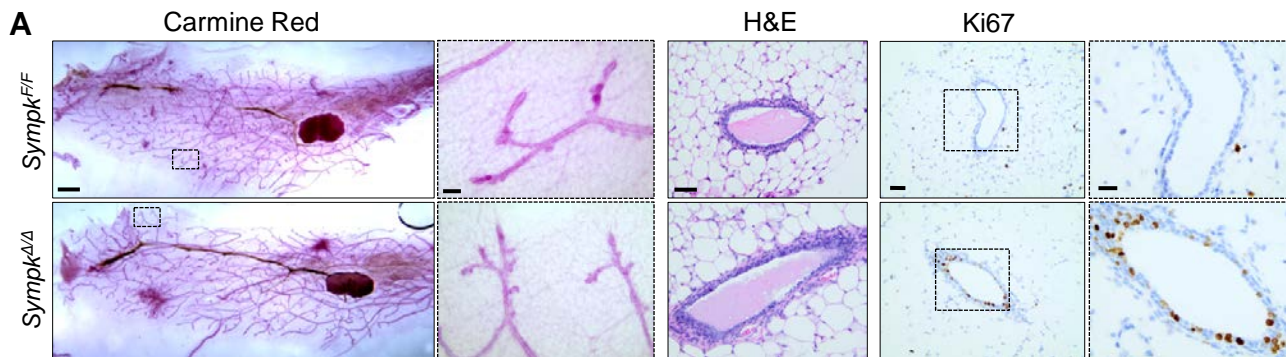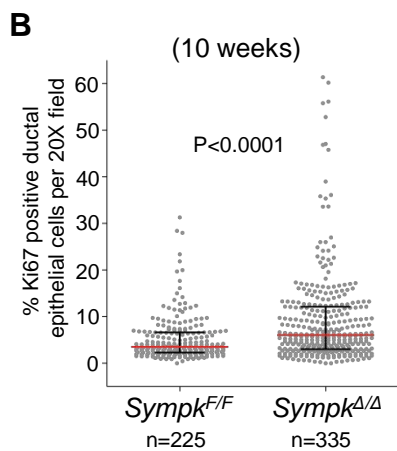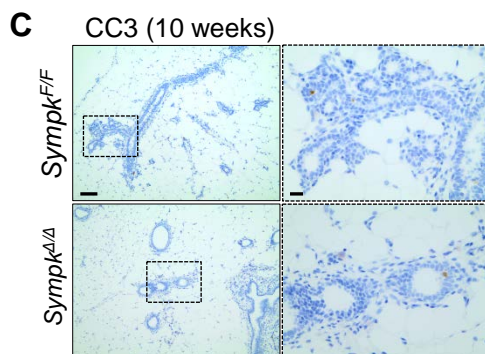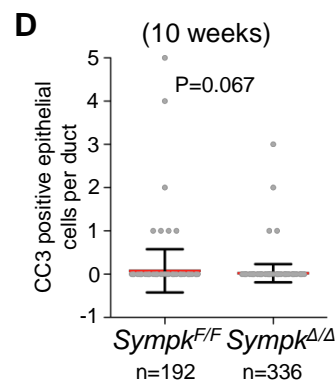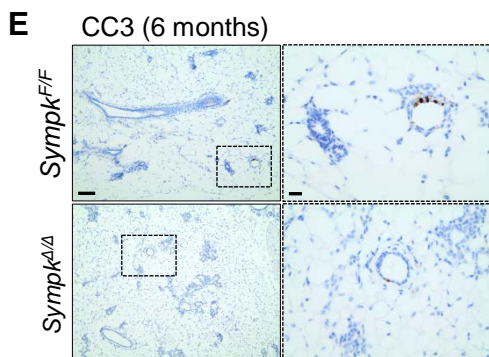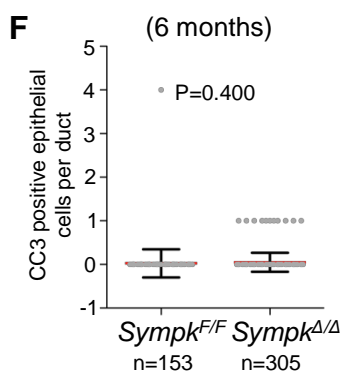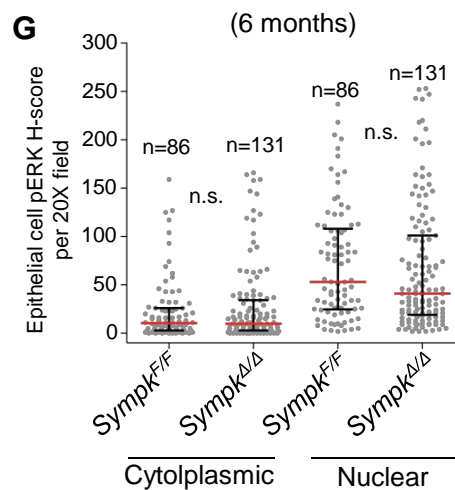

**Figure S5 related to Figure 5. *In vivo* deletion of *Sympk* in mouse mammary fibroblasts increases proliferation of adjacent ductal epithelium. (A)** Left: bright field images of whole mount inguinal mammary glands from 10-week-old *Sympk*<sup>F/F</sup> mice (control) or *Fsp-cre;Sympk*<sup>F/F</sup> (*Sympk*<sup>Δ/Δ</sup>) mice stained with carmine red to emphasize ductal branching (bar = 1000 μm). Boxes indicate area of magnification in adjacent panel (bar = 100 μm). Middle: H&E stained sections of opposite inguinal gland (bar = 50 μm). Right: representative images of sections of inguinal mammary gland immuno-stained for Ki67 (brown) and counterstained with hematoxylin (blue) (bar = 50 μm). Boxes indicate area of magnification in adjacent panel (bar = 20 μm). **(B)** Percent Ki67 positive epithelial cells per 20X field (dots) of tissue sections described in (A). Red bar, median; black bars, interquartile range; pooled counts from 6 control mice or 7 mice for the *Fsp-cre* group. P value: Mann-Whitney test of medians. **(C&E)** Representative images of sections of inguinal mammary gland from 10-week **(C)** or 6-month-old **(E)** *Sympk*<sup>F/F</sup> or *Sympk*<sup>Δ/Δ</sup> mice immuno-stained for cleaved caspase-3 (CC3; brown) and counterstained with hematoxylin (blue) (bar = 50 μm). Boxes indicate area of magnification in adjacent panel (bar = 20 μm). **(D&F)** Number of CC3 positive cells per duct (dots) of tissue described in (C) or (E) respectively. Red bar, mean; black bars, S.D.; pooled counts from 2 mice of each genotype. P value: Student's t-test. **(G)** Quantification of phospho-ERK (pERK) positive epithelium from both cytoplasmic and nuclear signal per 20X field (dots). Red bar, median; black bars, interquartile range; pooled counts from 4 *Sympk*<sup>F/F</sup> or 5 *Sympk*<sup>Δ/Δ</sup> 6-month-old mice. P value: Mann-Whitney test of medians. n.s., not significant.

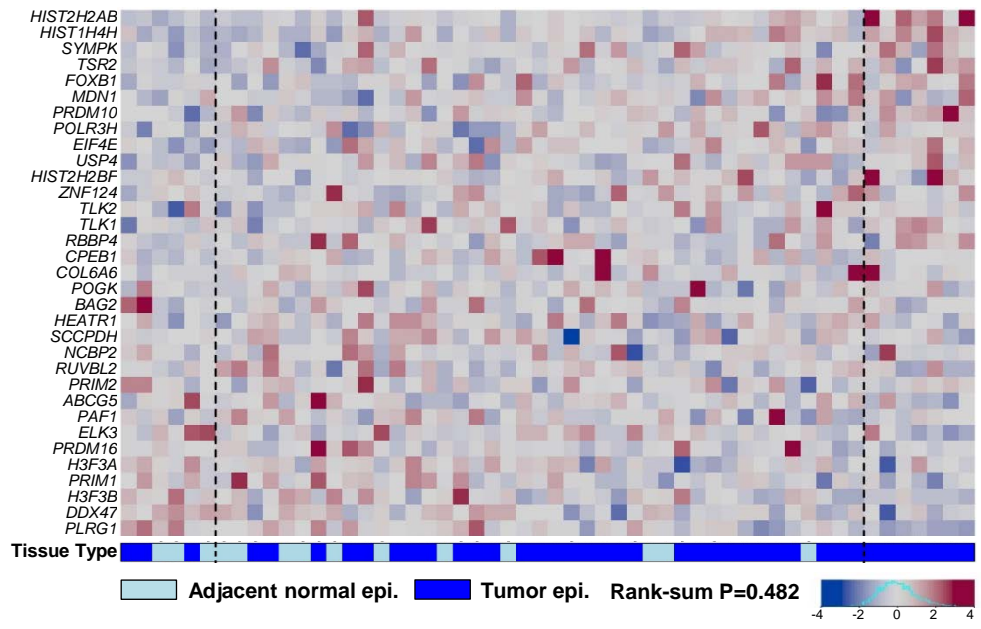

**Figure S6 related to Figure 6. The human ortholog signature fails to distinguish breast tumor epithelium from adjacent normal epithelium.** Heatmap displaying RNA expression of the 33 human orthologs in normal (n=14) and tumor epithelium (n=40) from breast cancer patients. Each sample was given a rank for each gene and ordered among the experimental samples according to the rank-sums. The boundaries (dashed lines) represent the 95% distribution limits for rank-sums of 10,000 randomly generated samples. The P value indicates the ability of the gene signature to distinguish normal from tumor epithelium in breast cancer patients. Epi., epithelium. See also Table S4.

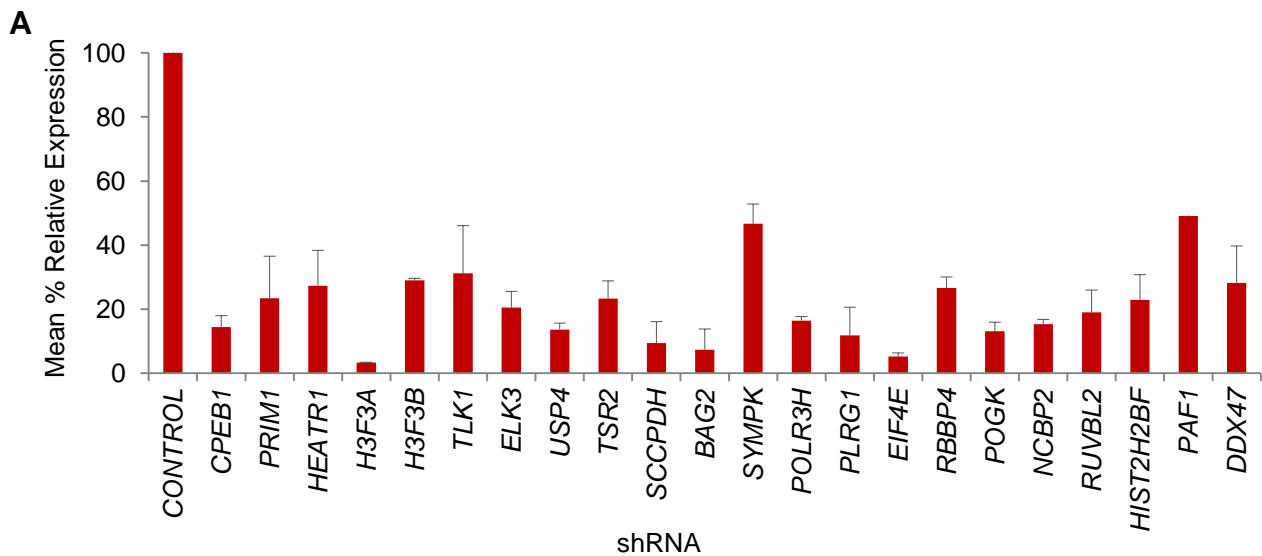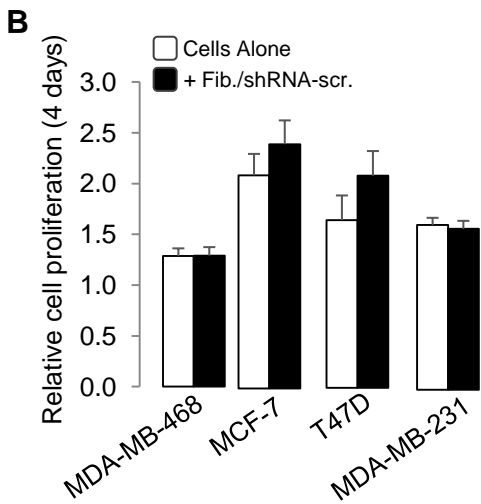

**C**

**Mutation status of breast cancer cell lines (x = no mutation)**

|                | RTK                                                                                    | Ras                     | Raf                      | NF1                     |
|----------------|----------------------------------------------------------------------------------------|-------------------------|--------------------------|-------------------------|
| <b>MDA-468</b> | DDR2 (V824A)<br>missense<br>EPHB6 (G403D)<br>missense<br>ERBB2 (G152fs)<br>frame-shift | x                       | x                        | (Q1033R)<br>missense    |
| <b>MCF-7</b>   | EPHA5 (L1009P)<br>missense<br>ERBB4 (Y1242C)<br>missense                               | x                       | x                        | x                       |
| <b>T47D</b>    | x                                                                                      | x                       | x                        | x                       |
| <b>MDA-231</b> | PDGFRA (Y172F)<br>missense                                                             | KRAS (G13D)<br>missense | BRAF (G464V)<br>missense | (L466fs)<br>frame-shift |
| <b>BT474</b>   | x                                                                                      | x                       | x                        | x                       |
| <b>MCF10A</b>  | x                                                                                      | x                       | x                        | x                       |

**Figure S7 related to Figure 7. Characterization of cells used in human co-culture**

**experiments (A)** 22 human orthologs were knocked down by lentiviral shRNA transduction as determined by real-time quantitative PCR analysis. Data are shown as mean percent residual gene expression  $\pm$  standard deviation relative to non-silencing shRNA and normalized with *GAPDH* expression. **(B)** Fold increase in cell number at day 4 of culturing for breast cancer cell lines alone or co-cultured with shRNA control (shRNA-scr.) infected fibroblasts (Fib.). n=3 independent experiments with each experiment performed in triplicate. Data are presented as average  $\pm$ SEM. See also Table S3. **(C)** Mutation status of breast cancer cell lines from Broad-Novartis Cancer Cell Line Encyclopedia (CCLE) <https://portals.broadinstitute.org/ccle/home>.
